# Supplementary material for: Transposable element-mediated structural variations drive gene expression and agronomic trait diversity in Brassica napus
Source: Research Square preprint supplement (doi:10.21203/rs.3.rs-6452497/v1), 2025-04-29
Supplement: Supplementary file 1 [file 9df966f4fb38c21fac304c1c.pdf]

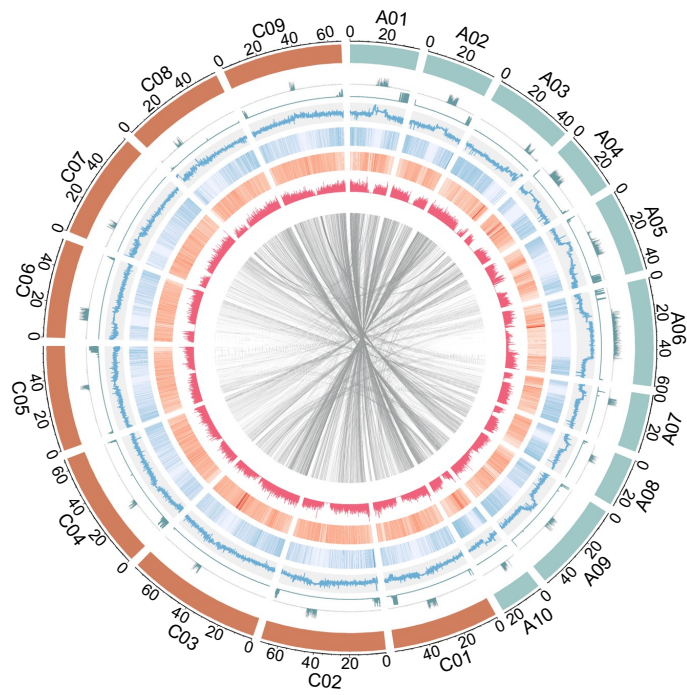

**Supplementary Figure 1. Overview of the Westar v1 genome.** Tracks from outermost to innermost represent centromere-specific repeats, telomere-specific repeats, GC content, gene density, transposon density, tandem repeats, and covariate blocks between subgenomes. Darker colors in the heatmap indicate higher densities.

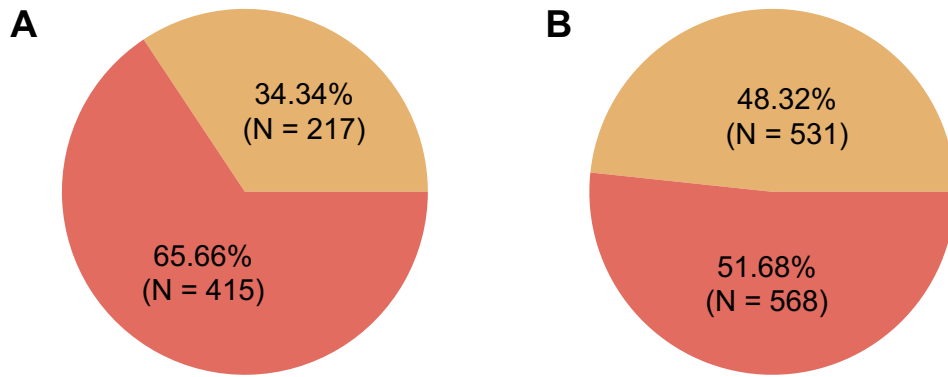

**Supplementary Figure 2. Number and proportion of genes expressed in the centromere region of the ZS11 genome. (A) is ZS11 v0 genome, and (B) is ZS11 v1 genome.**

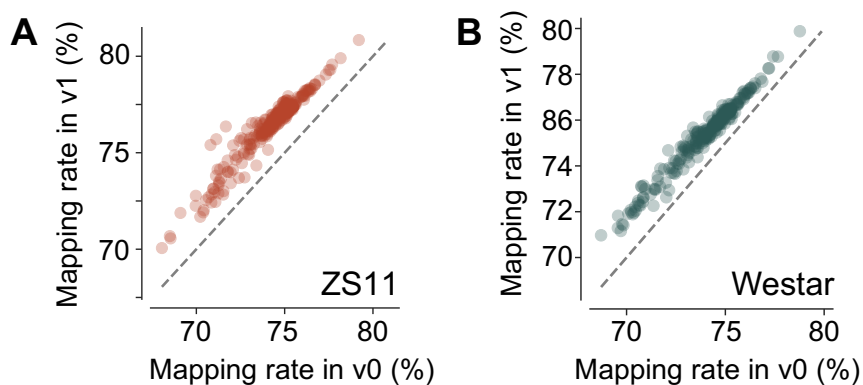

**Supplementary Figure 3. The RNAseq mapping rates in the ZS11 and Westar genome.** The axes represent RNAseq mapping rates for the v0 and v1 genomes of ZS11 (A) or Westar (B), with each point indicating an RNAseq sample.

**A**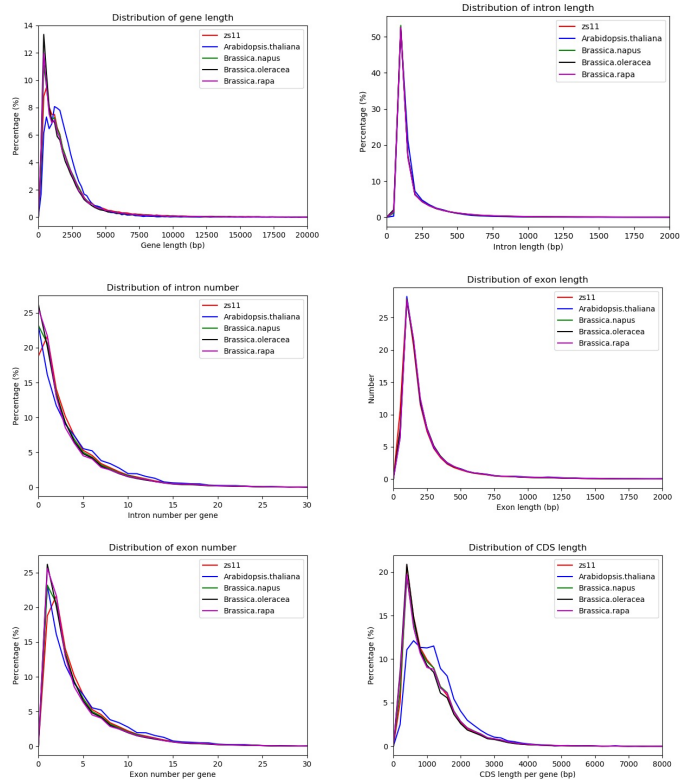**B**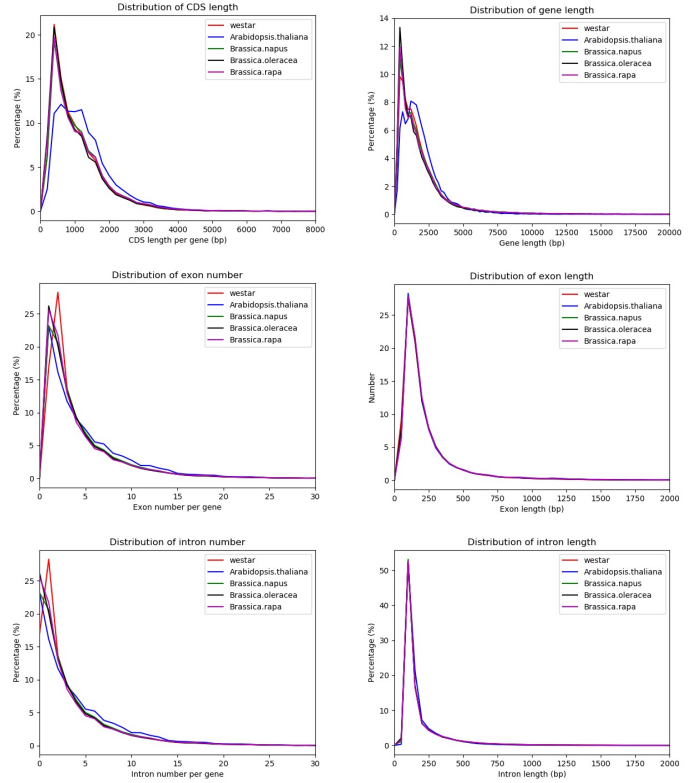

**Supplementary Figure 4. Characterization of genes of ZS11, Westar with other closely related species. (A) is ZS11 v1 genome, and (B) is Westar v1 genome.**

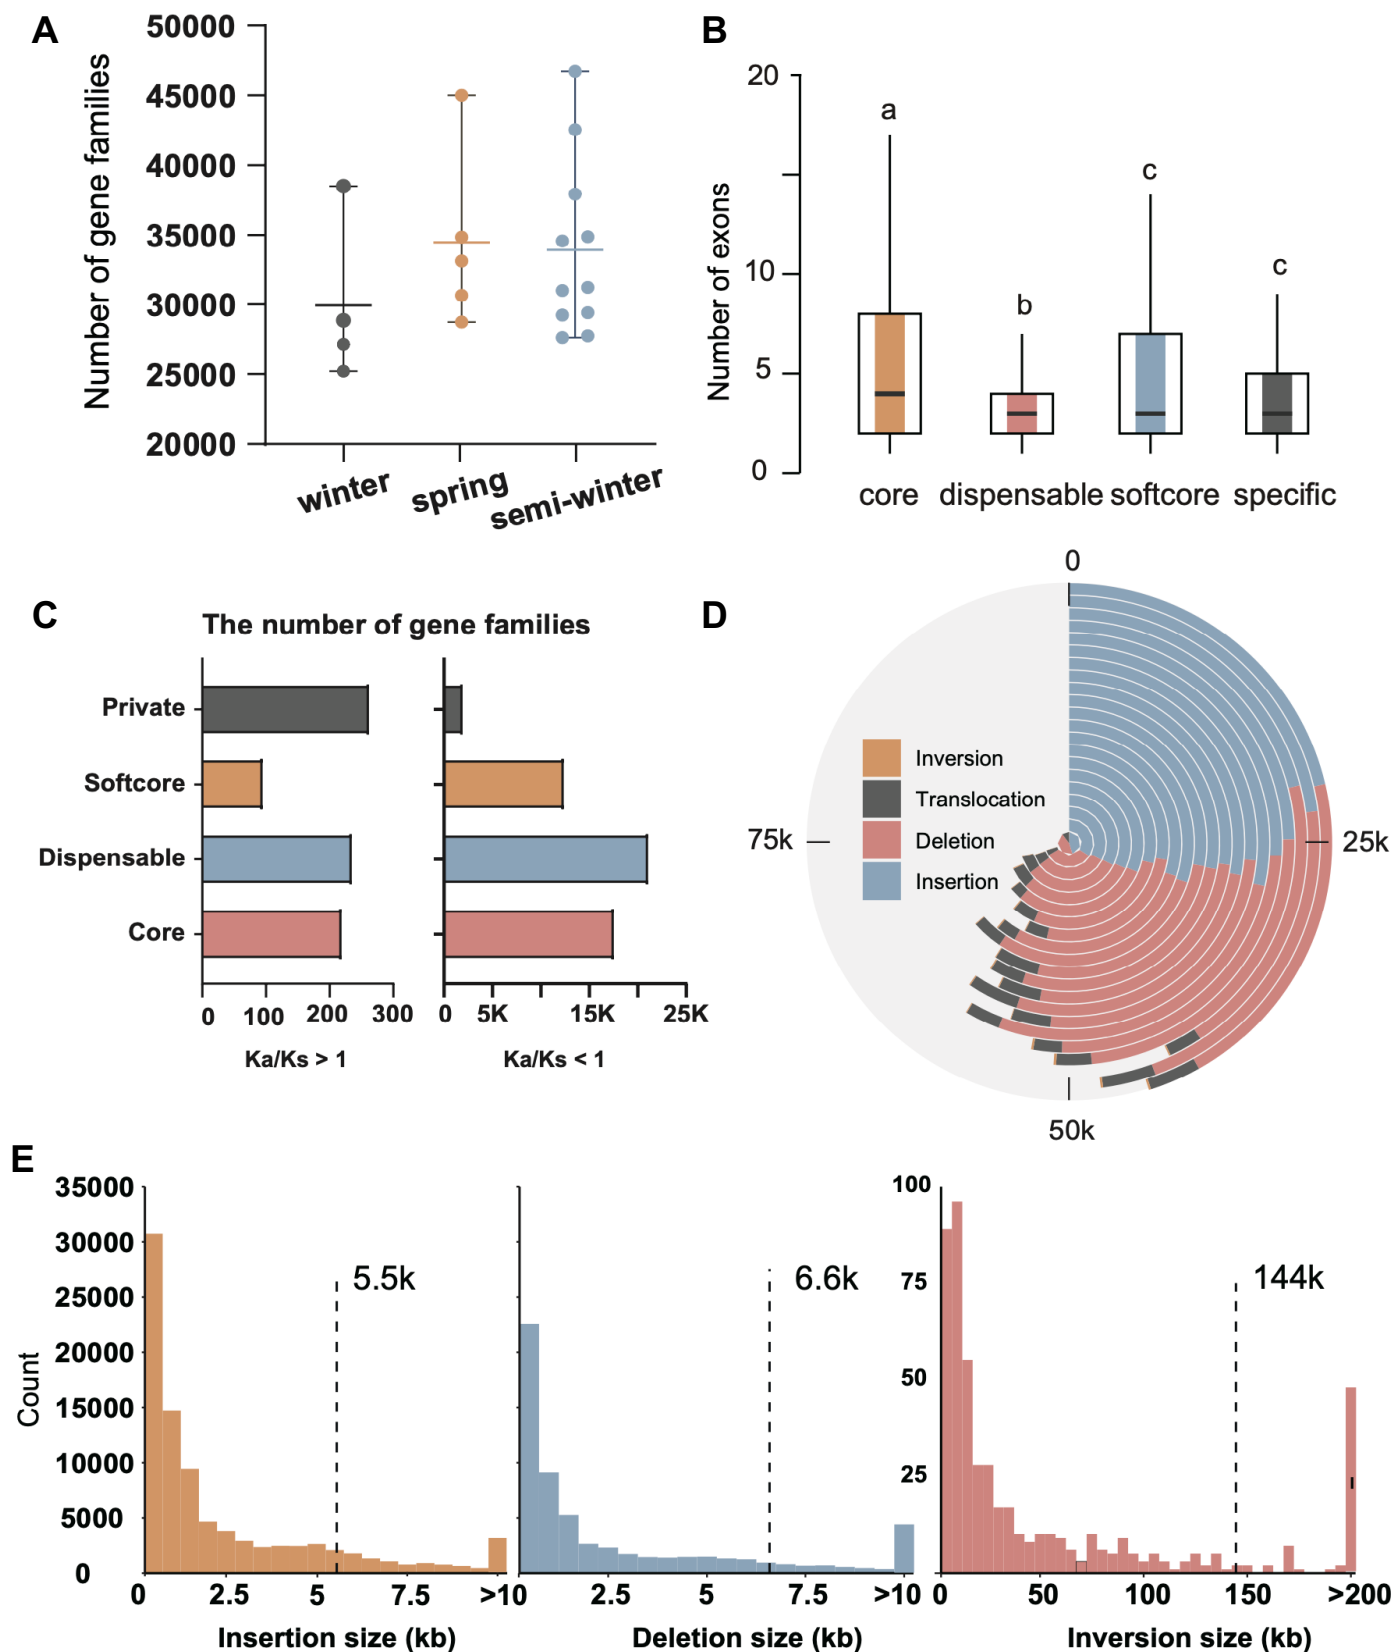

**Supplementary Figure 5. Pan-genome and structure variation of *B. napus*.** **A.** Gene families in different ecotype genomes in the pan-genome. **B.** Number of exons of genes in different clustered gene families. **C.** The number of gene families of different types with average  $Ka/Ks > 1$  (or  $Ka/Ks < 1$ ). **D.** Number of different variant types of SV in 2 genomes. **E.** Length of insertions, deletions, and inversion SVs across the genome.

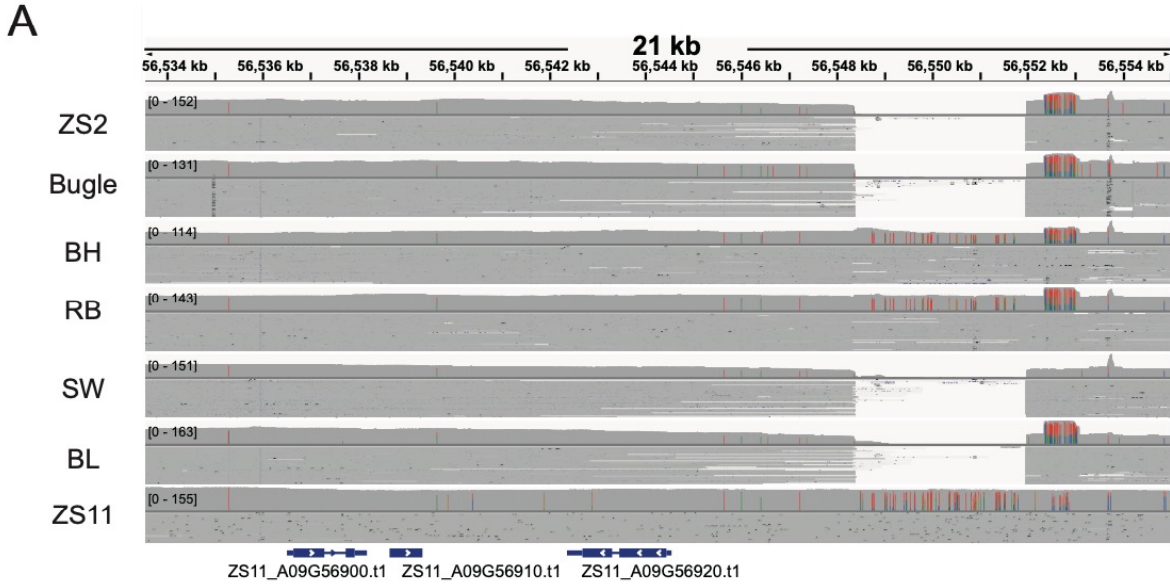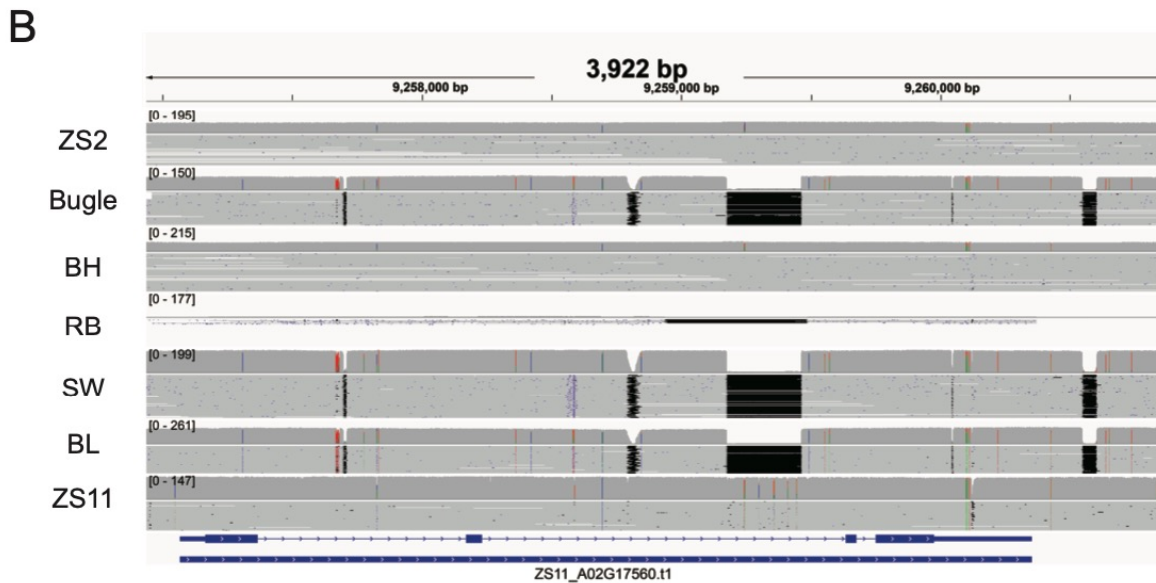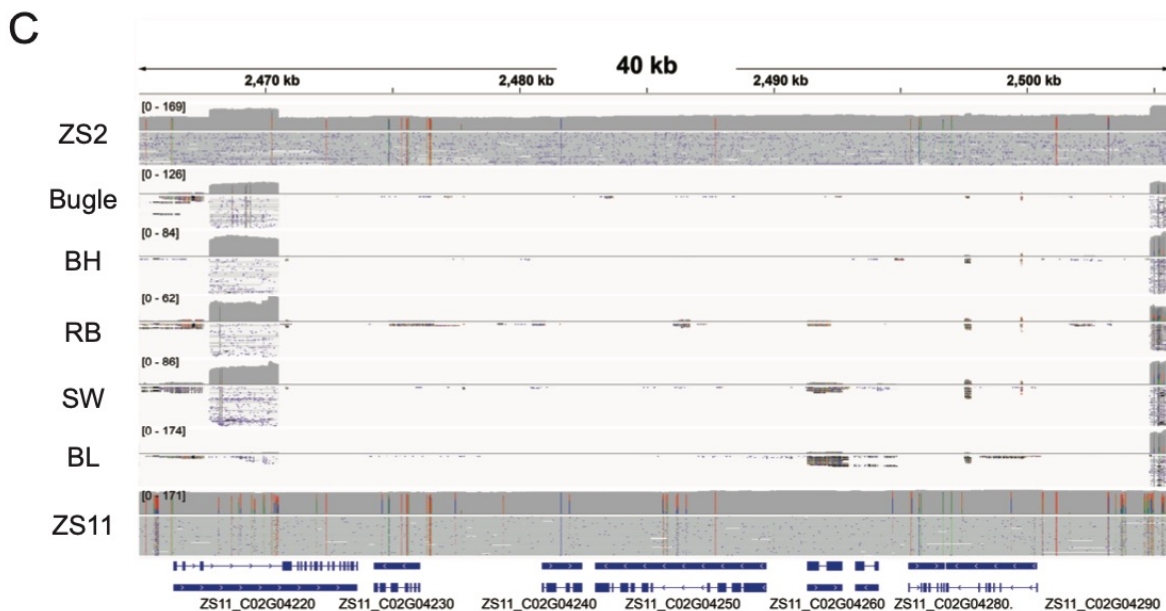

**Supplementary Figure 6. Validation of *BnaA09.CYP78A9*(A), *BnaA02.FT*(B) and *BnaC02.FLC*(C) structural variation using raw long reads mapped to the ZS11 genome. A. A 3.9-kb CACTA-like ET inserted upstream of the *CYP78A9* promoter region in ZS11 (Song *et al.*, 2020). B. A 200-bp PAV was found in different ecotypes. C. A large deletion including the region of *BnaC02.FLC* was detected in ZS11 and ZS2 ecotypes (Song *et al.*, 2020).**

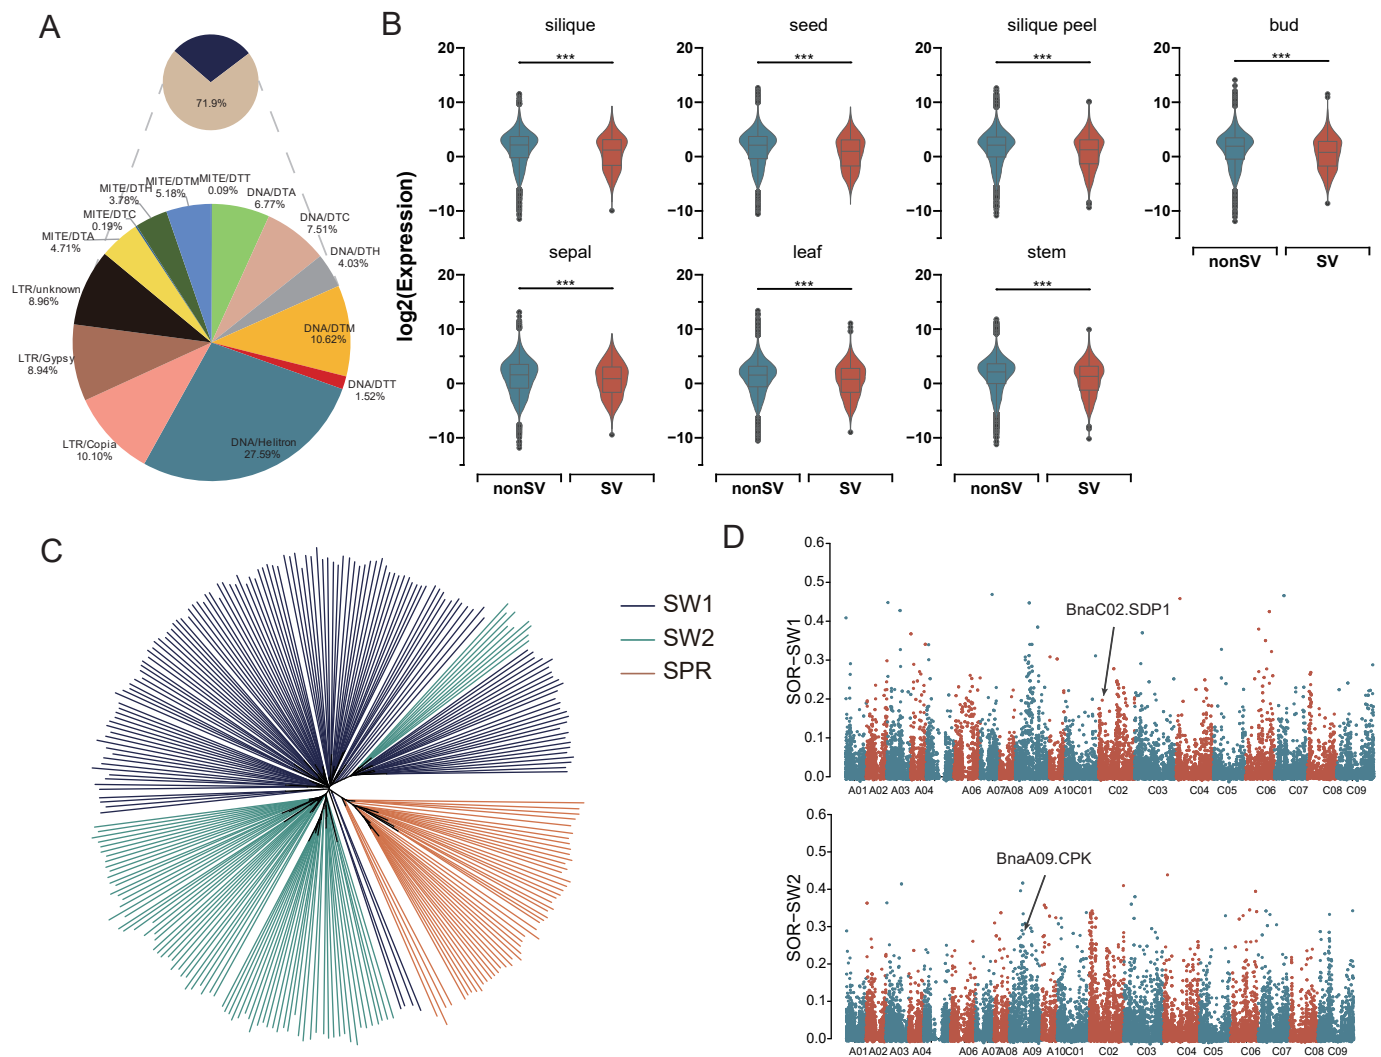

**Supplemental Figure 7. The effects of TEMSV on gene expression and the differential distribution of SVs in subpopulations. A.** The summary of TE-mediated SVs. **B.** Expression level of SV associated and non-SV gene in different tissues (p-value < 0.001, two-tailed Student's t-test for TPM). N (nonSV) = 107,640; n (SV) = 4,064. **C.** Neighbor-joining tree of 505 accessions of three ecotypes were constructed based on SVs. **D.** Genetic differentiation index  $F_{st}$  of spring accessions and different semi-winter accessions.

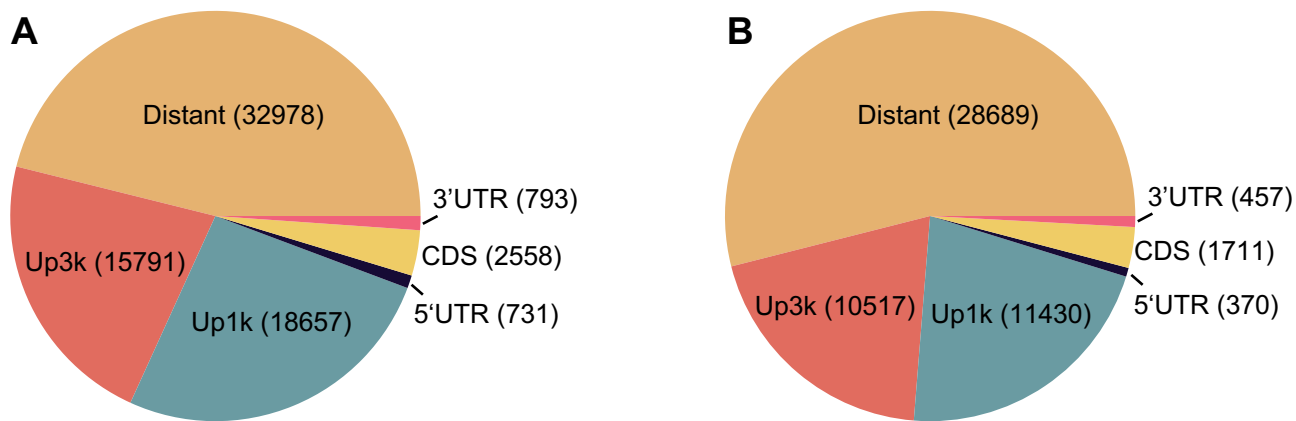

**Supplementary Figure 8. Proportion of TEMSVs among subgenomes. (A)** is An subgenome, and **(B)** is Cn subgenome.



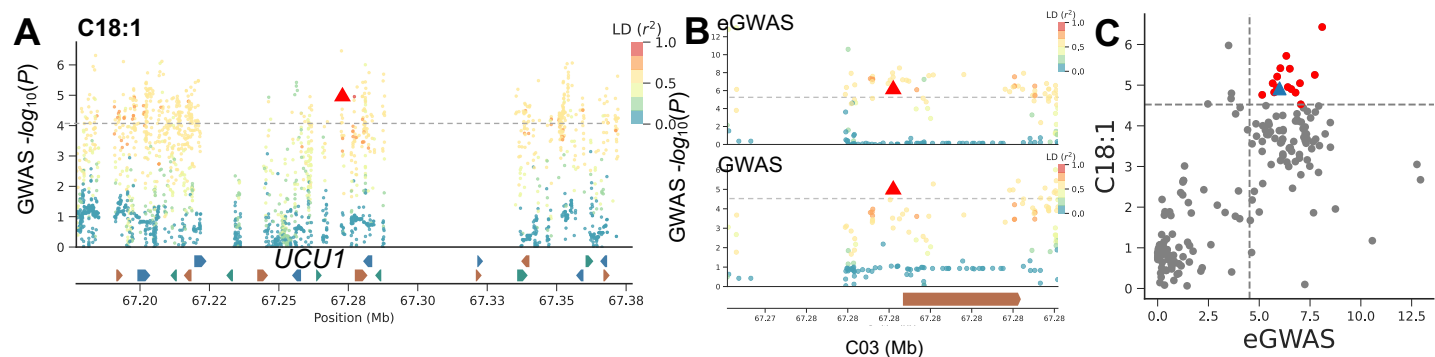

**Supplementary Figure 9. *BnaC03.UCU1* are key candidate genes affecting C18:1.** **A.** Manhattan plot of *BnaC03.UCU1* associated loci. The colors on the dots represent the LD between the variant and the Lead SNP, the bottom plot indicates the gene structure in the locus. **B.** *BnaC03.UCU1* localized eGWAS as well as GWAS results. Red triangles indicate 592 bp SV. bottom panel indicates the structure of *BnaC03.UCU1*. **C.** Horizontal coordinates indicate log-transformed  $P$  values of *BnaC03.UCU1* eGWAS variants in the C03 locus. Vertical coordinates indicate log-transformed  $P$  values for the C18:1 GWAS variant in the C03 locus. Blue triangles indicate 592 bp SV.

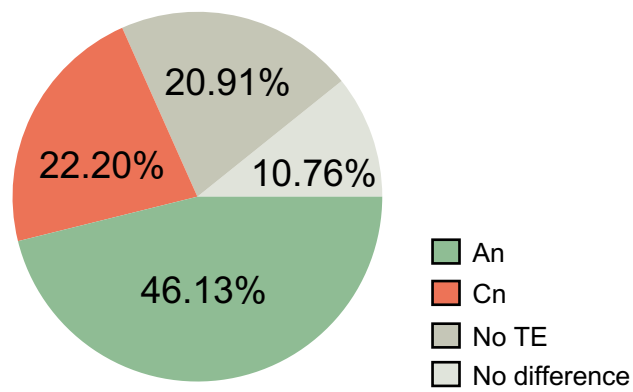

**Supplementary Figure 10. Distribution of TEMSV in HGP.** Red represents HGPs with a high number of gene TEMSVs in An, green represents HGPs with a high number of gene TE related SVs in Cn, light gray represents HGPs without TEs, and dark gray represents HGPs with no difference in the number of TEs between subgroups.

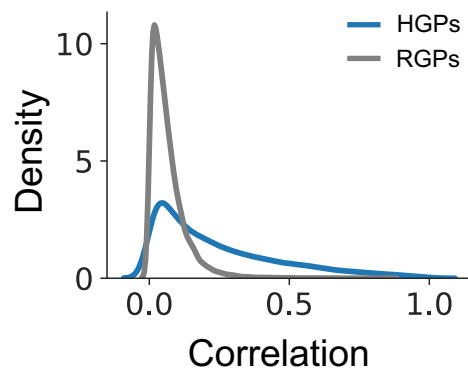

**Supplementary Figure 11. Correlation distribution of HGP expression in seed at 20 DAF.** The blue line indicates the distribution of absolute values of expression correlation between homoeologous copies in HGP. The gray line indicates the correlation distribution performed for 20,000 RGPs.

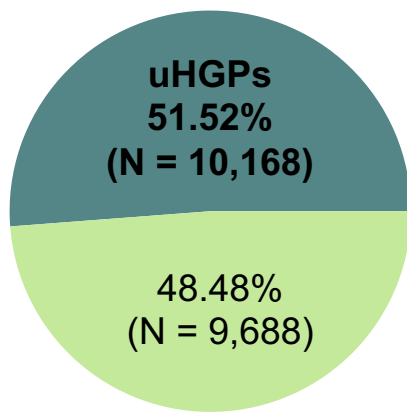

**Supplementary Figure 12. Proportion of uHGPs in the ZS11 tissues.**

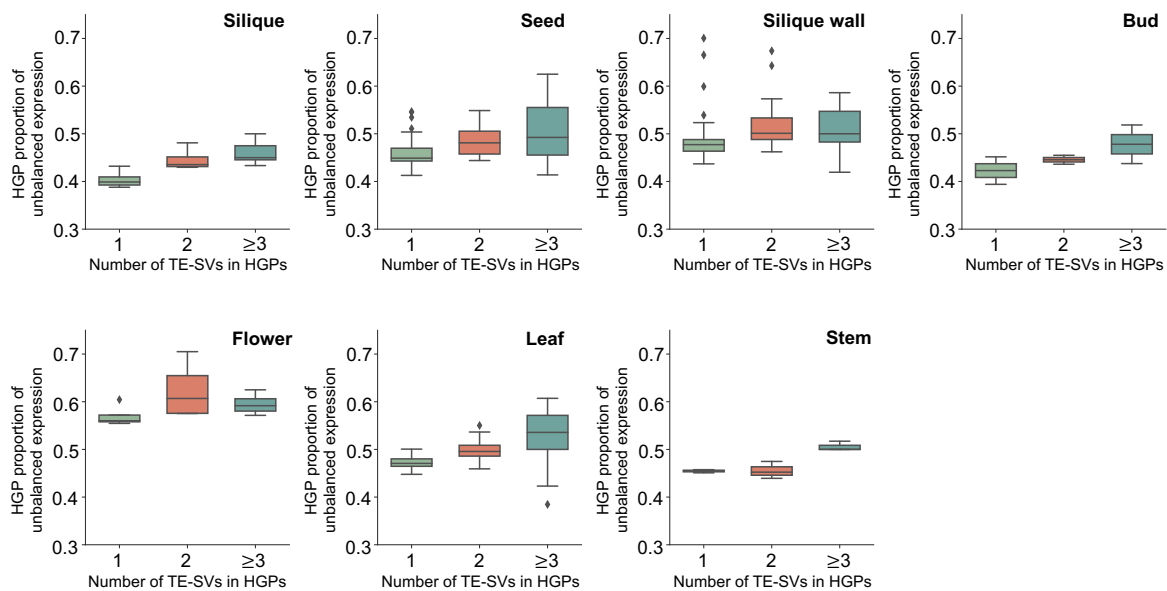

**Supplementary Figure 13. Effect of the TEMSVs number on the unbalanced expression HGP in various tissues.**

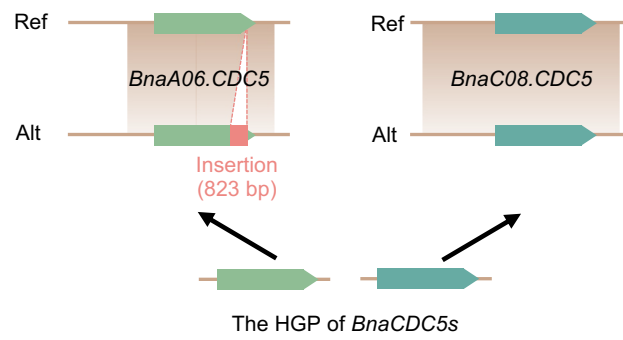

**Supplementary Figure 14. Structural view of *BnaCDC5s*, showing a 823 bp insertion in *BnaA06.CDC5*.**

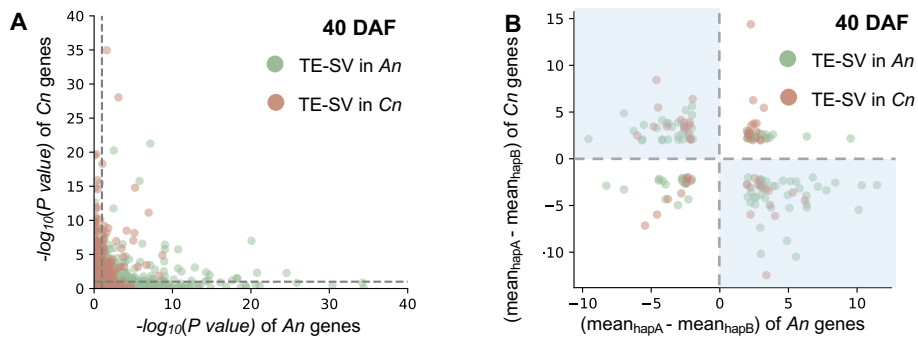

**Supplementary Figure 15. Changes in HGP are affected by TEMSV at 40 DAF.** **A.** The degree of change in HGP expression at 40 DAF. Green dots indicate TEMSV located near the *An* copy of HGP. Red dots indicate TEMSV located near the *Cn* copy of HGP. The horizontal coordinate represents the *P* values for expression differences between *An* genes in HGPs with and without TEMSV, calculated by Student's t-test. The vertical coordinate represents the *P* values for expression differences between *Cn* genes in HGPs with and without TEMSV, calculated by Student's t-test. **B.** The direction of change in HGP expression at 40 DAF. Green dots indicate TEMSV located near the *An* copy of HGP. Red dots indicate TEMSV located near the *Cn* copy of HGP. The horizontal coordinate indicates the difference between the expression means in the HGP between *An* genes in HGPs with and without TEMSV. The vertical coordinate indicates the difference between the expression means in the HGP between *Cn* genes in HGPs with and without TEMSV. Shading indicates that homoeologous genes in HGP change in the opposite direction.
