# Supplementary material for: Transposable element-mediated structural variations drive gene expression and agronomic trait diversity in Brassica napus
Source: Research Square preprint supplement (doi:10.21203/rs.3.rs-6452497/v1), 2025-04-29
Supplement: Supplementary file 1 [file 45efdbfda75213d853d2e0c1.xlsx]

## Sheet: Sup Table1
Supplementary Table 1. Statistics of Nanopore sequencing data
	ZS11	Westar
Total bases	154131333410	81313314639
Mean read length	55963.4	40439.2
Mean read quality	10.5	12.5
Median read length	57209	34700
Median read quality	10.6	13.3
Number of reads	2754143	2010754
Read length N50	69111	58646
STDEV read length	36708.1	32771.8

## Sheet: Sup Table2
Supplementary Table 2. The centromeric region in ZS11 v1 genome
Centromere length (bp)	Start	End
A01	17406398	22392518
A02	19815609	26497280
A03	34402818	39795217
A04	6910371	12699822
A05	16905977	35591965
A06	15912411	34951349
A07	6012261	13984352
A08	6500439	13894163
A09	21700191	41584645
A10	5903894	16080039
C01	28999941	35400512
C02	39820188	45983003
C03	47603544	52184322
C04	21999998	28160943
C05	31229036	34959589
C06	13003664	18899885
C07	12308901	18387567
C08	13202127	17195072
C09	34104646	38386360
Total	153286189

## Sheet: Sup Table3
Supplementary Table 3. The centromeric region in Westar v1 genome
Centromere length (bp)	Start	End
A01	17200574	24396714
A02	19899449	25900467
A03	34699455	39300495
A04	6700018	15799989
A05	13600079	29699956
A06	16107287	45794203
A07	6300060	10399672
A08	6699895	11195188
A09	21606330	28797962
A10	5309338	10687260
C01	28799497	34597569
C02	41100085	47724003
C03	45808665	50199950
C04	22612160	26399982
C05	31400113	34592580
C06	11621022	19351246
C07	13110943	16881128
C08	14115245	18596221
C09	33811207	36896451
Total	136709614

## Sheet: Sup Table4
Supplementary Table 4. GO enrichment analysis of centromere region genes in ZS11 v1 genome
GO ID	GO Term	Family number	Intersection number	Fold Enrichment	Raw P-value	FDR
GO:0009772	photosynthetic electron transport in photosystem II	10	3	76.32	6.95e-06	0.00963
GO:0009767	photosynthetic electron transport chain	47	5	27.06	1.15e-06	0.00319
GO:0022900	electron transport chain	118	8	17.25	2.24e-08	0.000124
GO:0006091	generation of precursor metabolites and energy	401	10	6.34	4.26e-06	0.00787
GO:0005198	structural molecule activity	481	11	5.82	3.17e-06	0.0102
GO:0000312	plastid small ribosomal subunit	14	3	54.51	2.08e-05	0.00679
GO:0009547	plastid ribosome	31	4	32.83	6.55e-06	0.0064
GO:0000314	organellar small ribosomal subunit	27	3	28.27	0.000161	0.0394
GO:0000313	organellar ribosome	75	5	16.96	1.19e-05	0.0058

## Sheet: Sup Table5
Supplementary Table 5. Comparison of statistics on genomic annotation ZS11 v1 genome and ZS11 v0 genome
	ZS11 v0	ZS11 v1	Westar v0	Westar v1
Mean gene length (bp)	2061.34	2498.39	2110.54	2229.65
Number of exons	536613	537387	484208	522331
Mean exon length (bp)	238.69	229.38	235.67	230.38
Percent of multi-exon genes (%)	0.7886	0.8208	0.7879	0.8403
Number of genes having UTRs	23575	34785	29694	35130
Percent of genes having UTRs (%)	0.2336	0.3114	0.3045	0.307
Number of UTRs	55510	73725	56754	69762

## Sheet: Sup Table6
Supplementary Table 6. Summary statistics of the 6 assembled B. napus genomes
Accession	Type	Genome size (bp)	Annotated genes	Scaffold N50 (bp)	Contig N50 (bp)	Completeness (%, BUSCO)
ZS2	Semi-winter	949560537	93377	52522605	4619496	99.09
Bugle	Spring	918147413	98777	51834235	3139467	98.81
352	Semi-winter	824774402	90960	51444211	2985931	98.6
862	Semi-winter	876188784	94978	52511455	3623135	98.95
Ribenyoucai	Semi-winter	934157004	97727	52859328	3462259	99.02
Baihua	Semi-winter	887936211	97550	51269559	1443205	99.02

## Sheet: Sup Table7
Supplementary Table 7. Gene Ontology (GO) analysis for gene families in 20 B. napus genomes
ID	Description	GeneRatio	BgRatio	pvalue	p.adjust	qvalue	geneID	Count	Type
GO:0006139	nucleobase-containing compound metabolic process	26/5994	41/18948	2.78306e-05	0.0103808	0.00981394	OG0001338/OG0001996/OG0003659/OG0004576/OG0004714/OG0008563/OG0009940/OG0011273/OG0012988/OG0013297/OG0013596/OG0016056/OG0017833/OG0017944/OG0018208/OG0018392/OG0018828/OG0018961/OG0019042/OG0020140/OG0020455/OG0021968/OG0023814/OG0034247/OG0034614/OG0035101	26	Core
GO:0016787	hydrolase activity	108/5994	255/18948	0.000186725	0.0389381	0.0368118	OG0000159/OG0000195/OG0000340/OG0000648/OG0000811/OG0000927/OG0000938/OG0001280/OG0001352/OG0001795/OG0001854/OG0001859/OG0001885/OG0001912/OG0001933/OG0002117/OG0002367/OG0002732/OG0002984/OG0002990/OG0003118/OG0003240/OG0003262/OG0003590/OG0003642/OG0003684/OG0003713/OG0003848/OG0003914/OG0004185/OG0004201/OG0004538/OG0004961/OG0005300/OG0007230/OG0007611/OG0007623/OG0007670/OG0007937/OG0008063…	108	Core
GO:0006396	RNA processing	52/5994	111/18948	0.000556611	0.049422	0.0467232	OG0000523/OG0000861/OG0002005/OG0002146/OG0002240/OG0002757/OG0002833/OG0002885/OG0002986/OG0003551/OG0004008/OG0005912/OG0007227/OG0007660/OG0008563/OG0009178/OG0009793/OG0010073/OG0010731/OG0011216/OG0011606/OG0011951/OG0012007/OG0012080/OG0012475/OG0012818/OG0013122/OG0013721/OG0014123/OG0014354/OG0014373/OG0014549/OG0015149/OG0015708/OG0015778/OG0016681/OG0016883/OG0017254/OG0018004/OG0018487…	52	Core
GO:0008270	zinc ion binding	140/5994	351/18948	0.000596244	0.049422	0.0467232	OG0000140/OG0000985/OG0001105/OG0001223/OG0001569/OG0001872/OG0001900/OG0002014/OG0002069/OG0002094/OG0002532/OG0002877/OG0002890/OG0002992/OG0003118/OG0003132/OG0003194/OG0003405/OG0003431/OG0003456/OG0003777/OG0003866/OG0004370/OG0004552/OG0005026/OG0005076/OG0005100/OG0005685/OG0005771/OG0005910/OG0006394/OG0007029/OG0007094/OG0007254/OG0007679/OG0007715/OG0007885/OG0008011/OG0008018/OG0008538…	140	Core
GO:0016747	acyltransferase activity	46/7185	75/18948	3.26321e-05	0.0220405	0.0217368	OG0004322/OG0004601/OG0005861/OG0006358/OG0021694/OG0027415/OG0029326/OG0030300/OG0030969/OG0030970/OG0031552/OG0031581/OG0031910/OG0032149/OG0032196/OG0032967/OG0036342/OG0036368/OG0046594/OG0047951/OG0049154/OG0049417/OG0049418/OG0050490/OG0050518/OG0051255/OG0051344/OG0051490/OG0051830/OG0056390/OG0057884/OG0058049/OG0058843/OG0059310/OG0059424/OG0062407/OG0063429/OG0068207/OG0072222/OG0072528…	46	Softcore
GO:0008137	NADH dehydrogenase (ubiquinone) activity	14/7185	17/18948	0.000232619	0.0433253	0.0427285	OG0001184/OG0023181/OG0035299/OG0048560/OG0052111/OG0054709/OG0059239/OG0064416/OG0074472/OG0076100/OG0087253/OG0089401/OG0095881/OG0098002	14	Softcore
GO:0009733	response to auxin	52/7185	92/18948	0.000217656	0.0433253	0.0427285	OG0000042/OG0004915/OG0005220/OG0006935/OG0007143/OG0007425/OG0022129/OG0025086/OG0027083/OG0030874/OG0030975/OG0031540/OG0032243/OG0032257/OG0033024/OG0033033/OG0033074/OG0033389/OG0033989/OG0036327/OG0038532/OG0039334/OG0041821/OG0043639/OG0044521/OG0046985/OG0048446/OG0051778/OG0058921/OG0059453/OG0059815/OG0060043/OG0067094/OG0067162/OG0068271/OG0070079/OG0072507/OG0073136/OG0074495/OG0079829…	52	Softcore
GO:0001228	DNA-binding transcription activator activity	21/2252	45/18948	7.50693e-09	3.88276e-06	3.81593e-06	OG0102144/OG0103907/OG0104904/OG0105787/OG0106726/OG0107623/OG0117880/OG0118802/OG0119733/OG0119738/OG0120643/OG0121888/OG0121898/OG0122835/OG0123033/OG0123034/OG0123724/OG0126536/OG0127085/OG0128853/OG0129605	21	Private
GO:0016602	CCAAT-binding factor complex	21/2252	46/18948	1.22678e-08	3.88276e-06	3.81593e-06	OG0102144/OG0103907/OG0104904/OG0105787/OG0106726/OG0107623/OG0117880/OG0118802/OG0119733/OG0119738/OG0120643/OG0121888/OG0121898/OG0122835/OG0123033/OG0123034/OG0123724/OG0126536/OG0127085/OG0128853/OG0129605	21	Private
GO:0004865	protein serine/threonine phosphatase inhibitor activity	6/2252	10/18948	0.000383887	0.0405	0.039803	OG0104107/OG0105019/OG0105955/OG0107962/OG0118942/OG0120934	6	Private

## Sheet: Sup Table8
Supplementary Table 8. Number of different types of structural variants within each genome compared to the ZS11 reference genome
	Insertion Number	Deletion Number	Inversion Numer	Translocation Number
BH	25847	24486	58	3328
BL	29435	28558	93	3935
BU	27291	26220	108	4593
Da-Ae	27137	26575	136	3564
GH06	20810	19935	128	3103
RB	27046	25356	103	5125
SW	27780	26581	71	2752
TA	31675	31323	174	5622
WE	33309	31495	165	3513
ZS2	26518	25085	105	4108
ZY821	22366	20925	146	3356
Darmor	31931	31297	149	4706
Express617	30673	29263	127	2736
Gangan	25326	23969	162	2106
No2127	44169	43349	291	9714
P130	20513	19177	101	2230
P202	27068	25243	130	3567
Quinta	31007	29916	241	5409
Shengli	28082	27178	207	4180
Xiaoyun	29080	27588	183	2800
Zheyou7	24108	23082	179	2473
* The sequence which are unique present in query genome and absent in ZS11 reference genome.

## Sheet: Sup Table9
Supplementary Table 9. Number of SVs in each chromosome of B. napus graph pan-genome
Chromosome	Insertion	Deletion	Inversion
A01	7330	4836	35
A02	7821	5493	23
A03	9795	6563	29
A04	6361	4458	17
A05	7134	5093	51
A06	7423	5179	34
A07	7313	4885	28
A08	5511	3666	20
A09	11069	7556	41
A10	4901	3293	21
C01	5134	4686	19
C02	6764	6219	34
C03	9035	7986	33
C04	5805	5178	33
C05	3265	2824	19
C06	4715	4294	26
C07	5620	4841	34
C08	4353	3784	24
C09	5487	4851	20
Total	124836	95685	541

## Sheet: Sup Table10
Supplementary Table 10. Number of SVs in each sample of B. napus graph pan-genome
Genome	Core	Softcore	Dispensable	Private
p130	744	3850	33729	1367
GH06	744	4011	33741	2249
Zy821	744	4101	36454	1992
zheyou	744	4188	38647	3611
gangan	744	4219	41094	3238
BH	744	4067	42531	2991
ZS2	744	4217	44375	2267
p202	744	4376	45247	1944
RB	744	4106	42546	5006
BU	744	4210	46029	2528
DaAe	744	4146	44829	3993
SW	744	3988	46235	3394
shengli	744	4182	44013	6321
xiaoyun	744	4163	49134	2627
BL	744	4035	49498	3716
express617	744	4172	53071	1949
quinta	744	4321	53091	2767
TA	744	4164	55510	2580
darmor10	744	4344	55581	2559
WE	744	4313	56934	2813
no2127	744	4030	57792	24952

[truncated: 2 more sheets: Sup Table11, Sup Table12]
